# Supplementary material
Source: PubMed Central journal article supplement (PMC8269962)
Supplement: NIHMS1675113-supplement-1.pdf [file NIHMS1675113-supplement-1.pdf]

## Supplementary information for

# Quadrivalent influenza nanoparticle vaccines induce broad protection

Seyhan Boyoglu-Barnum<sup>1,8</sup>, Daniel Ellis<sup>2,3,4,8</sup>, Rebecca A. Gillespie<sup>1,9</sup>, Geoffrey B. Hutchinson<sup>1,9</sup>, Young-Jun Park<sup>3</sup>, Syed M. Moin<sup>1</sup>, Oliver J. Acton<sup>3,7</sup>, Rashmi Ravichandran<sup>2,3</sup>, Mike Murphy<sup>2,3</sup>, Deleah Pettie<sup>2,3</sup>, Nick Matheson<sup>2,3</sup>, Lauren Carter<sup>2,3</sup>, Adrian Creanga<sup>1</sup>, Michael J. Watson<sup>5</sup>, Sally Kephart<sup>5</sup>, Sila Ataca<sup>1</sup>, John R. Vaile<sup>1</sup>, George Ueda<sup>2,3</sup>, Michelle C. Crank<sup>1</sup>, Lance Stewart<sup>2,3</sup>, Kelly K. Lee<sup>5</sup>, Miklos Guttman<sup>5</sup>, David Baker<sup>2,3,6</sup>, John R. Mascola<sup>1</sup>, David Veessler<sup>3</sup>, Barney S. Graham<sup>1,\*</sup>, Neil P. King<sup>2,3,10,\*</sup>, Masaru Kanekiyo<sup>1,10,\*</sup>

<sup>1</sup>Vaccine Research Center, National Institute of Allergy and Infectious Diseases, National Institutes of Health, Bethesda, MD 20892, United States.

<sup>2</sup>Institute for Protein Design, University of Washington, Seattle, WA 98195, United States.

<sup>3</sup>Department of Biochemistry, University of Washington, Seattle, WA 98195, United States.

<sup>4</sup>Graduate Program in Molecular and Cellular Biology, University of Washington, Seattle, WA 98195, United States.

<sup>5</sup>Department of Medicinal Chemistry, University of Washington, Seattle, WA 98195, United States.

<sup>6</sup>Howard Hughes Medical Institute, University of Washington, Seattle, WA 98195, United States.

<sup>7</sup>Present address: Macromolecular Structure Laboratory, The Francis Crick Institute, London, United Kingdom.

<sup>8</sup>These authors contributed equally: Seyhan Boyoglu-Barnum and Daniel Ellis.

<sup>9</sup>These authors contributed equally: Rebecca A. Gillespie and Geoffrey B. Hutchinson.

<sup>10</sup>These authors contributed equally: Neil P. King and Masaru Kanekiyo.

\*email: [bgraham@nih.gov](mailto:bgraham@nih.gov) (B.S.G.); [neil@ipd.uw.edu](mailto:neil@ipd.uw.edu) (N.P.K.); [kanekiyom@nih.gov](mailto:kanekiyom@nih.gov) (M.K.)

## Table of contents

|                       |       |    |
|-----------------------|-------|----|
| Supplementary fig. 1  | _____ | 2  |
| Supplementary fig. 2  | _____ | 3  |
| Supplementary fig. 3  | _____ | 4  |
| Supplementary fig. 4  | _____ | 5  |
| Supplementary fig. 5  | _____ | 6  |
| Supplementary table 1 | _____ | 7  |
| Supplementary table 2 | _____ | 12 |
| Supplementary table 3 | _____ | 13 |
| Supplementary table 4 | _____ | 14 |

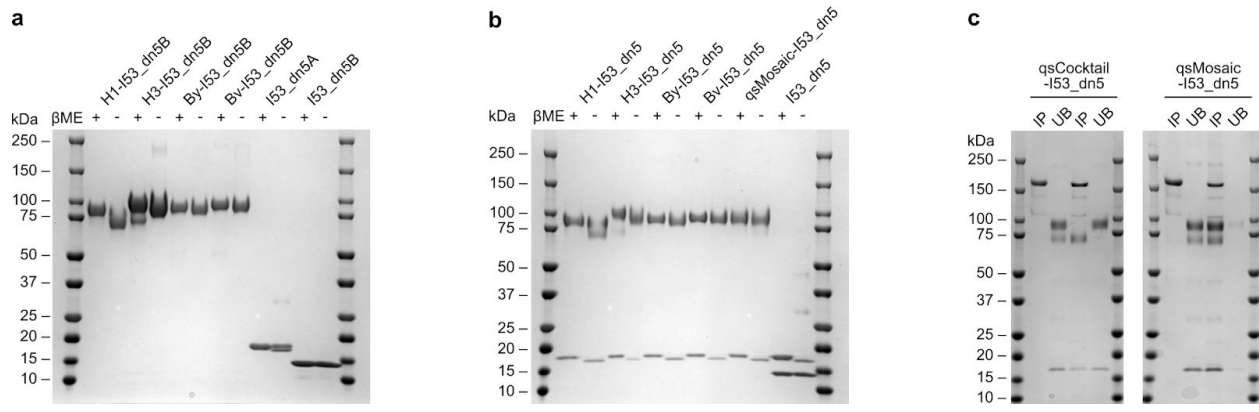

**Supplementary Fig. 1 | Uncropped SDS-PAGE of H1-I53\_dn5B fusions, purified nanoparticles and immunoprecipitations.** **a**, Uncropped SDS-PAGE gel from [Extended Data Fig. 1b](#). **b**, Uncropped SDS-PAGE gel from [Extended Data Fig. 1d](#). **c**, Uncropped SDS-PAGE gel of qsCocktail-I53\_dn5 and qsMosaic-I53\_dn5 immunoprecipitations from [Fig. 1d](#). IP, immunoprecipitated; UB, unbound.

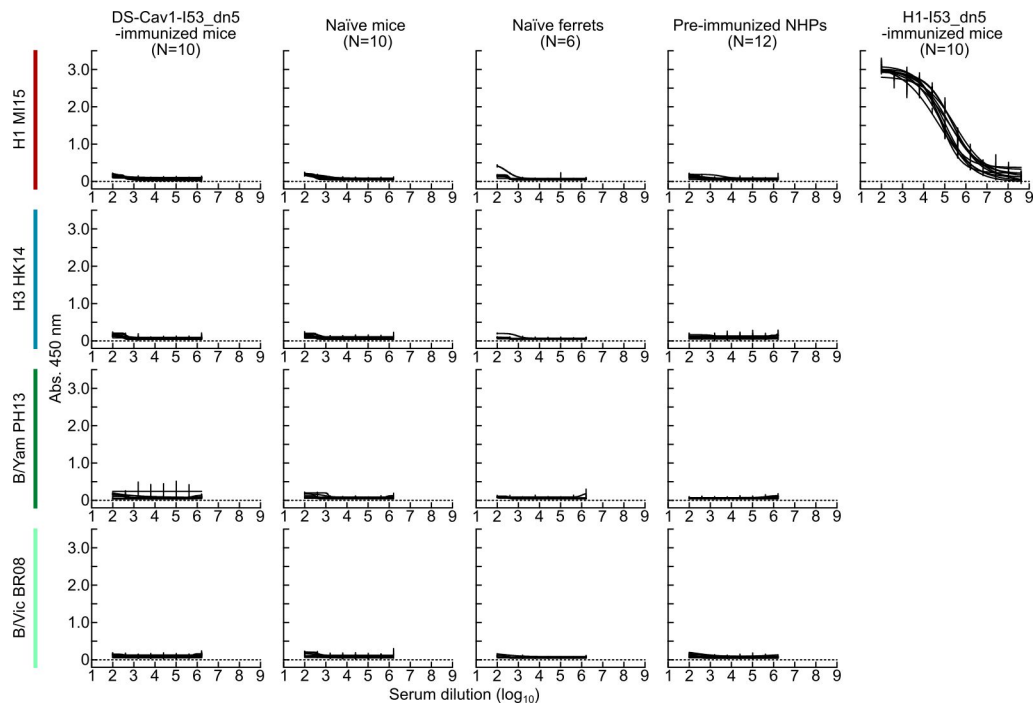

**Supplementary Fig. 2 | ELISA binding curves of serum samples obtained from unimmunized, PBS- or irrelevant antigen-immunized animals.** Mice and ferrets were immunized intramuscularly with PBS, DS-Cav1-I53\_dn5, or H1-I53\_dn5 plus AddaVax. NHP samples taken prior to immunization with our vaccines. Groups of BALB/cJ mice ( $N = 10$ ), Finch ferrets ( $N = 6$ ), and rhesus macaques ( $N = 12$ ) were used. ELISA binding curves for HAs of H1 MI15, H3 HK14, B/Yam PH13 and B/Vic BR08 are shown. All animal experiments except for NHP were performed at least twice and representative data are shown.

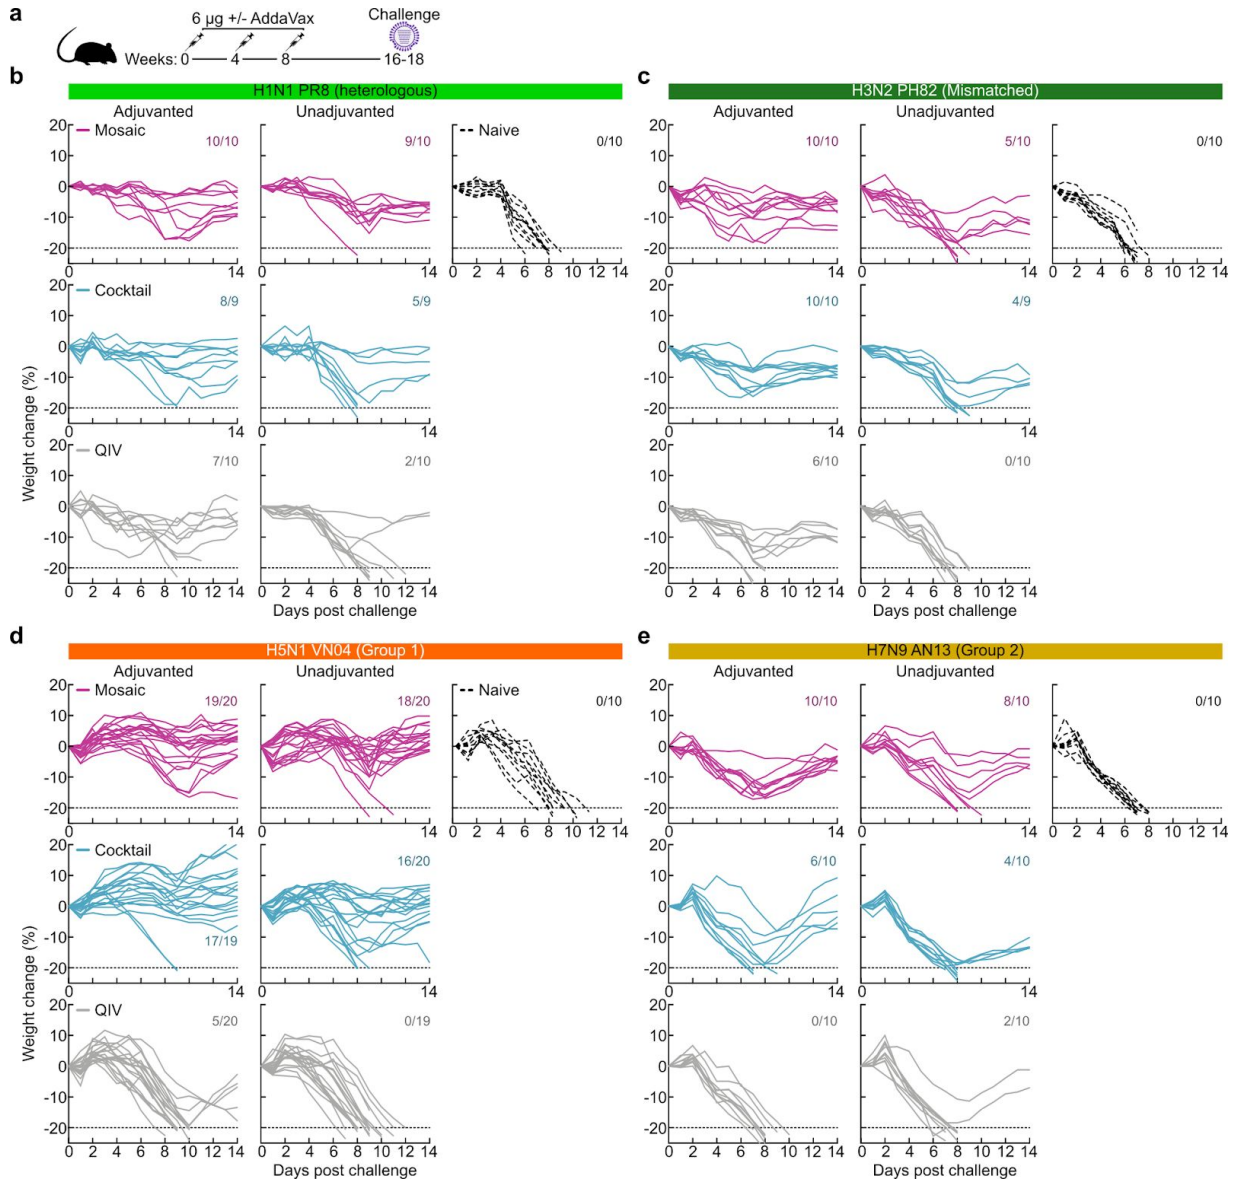

**Supplementary Fig. 3 | Body weight changes for mouse challenge studies.** **a**, Experimental scheme of mouse challenge studies. Changes in body weight after heterologous H1N1 (**b**), mismatched H3N2 (**c**), heterosubtypic H5N1 (**d**) or H7N9 (**e**) virus infection in immunized BALB/cJ mice ( $N = 10$ ;  $N = 9$  for qsCocktail-I53\_dn5 groups in **b** and unadjuvanted qsCocktail-I53\_dn5 group in **c**;  $N = 19$  for adjuvanted qsCocktail-I53\_dn5 and unadjuvanted QIV group in **d**; and  $N = 20$  for all other groups in panel **d**). Viruses were given intranasally on day 0 and mice were monitored for 14 days post infection. Body weight curves are plotted for each individual animal. Animals suffered >20% of body weight loss from day 0 were humanely euthanized.

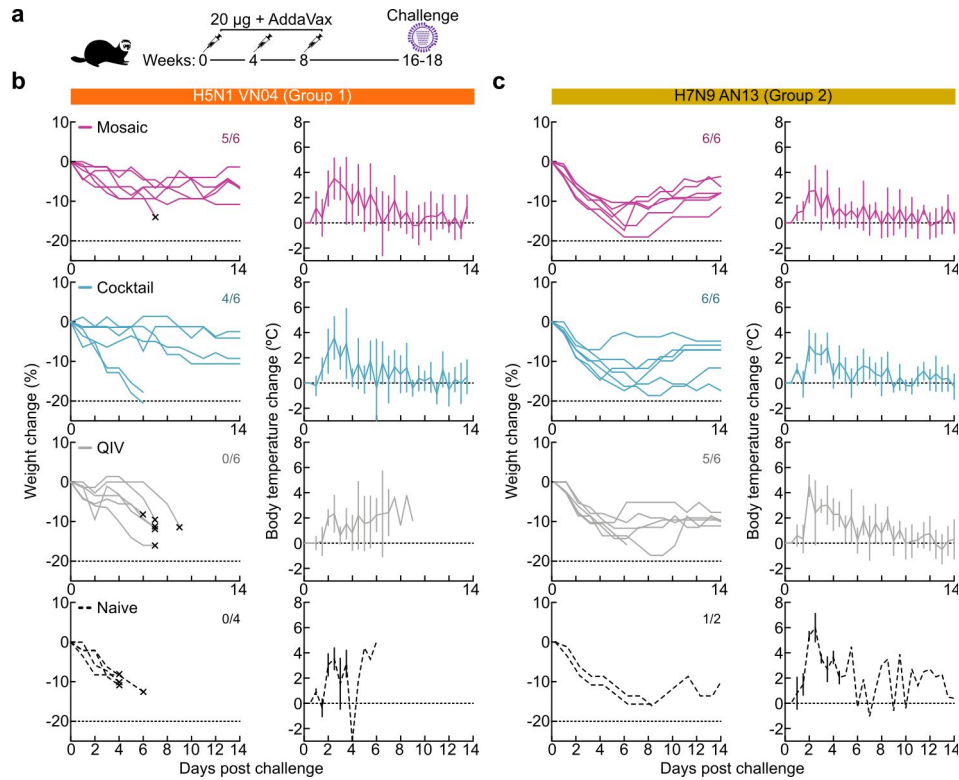

**Supplementary Fig. 4 | Body weight and temperature changes for ferret challenge studies.** **a**, Experimental scheme of ferret challenge studies. Body weight (left) and temperature (right) changes after heterosubtypic H5N1 (**b**) or H7N9 (**c**) virus infection in immunized ferrets. Viruses were given intranasally on day 0 and animals were monitored for 14 days post infection. Changes in body weight and temperature are plotted for each individual animal. Predetermined humane endpoints include >20% of body weight loss from day 0 or other symptoms such as neurological abnormalities and moribund state. X symbols indicate animals euthanized based on the symptom-based humane endpoints. These animals exhibited one or more of the following symptoms: neurological abnormalities, bilateral hind leg paresis or paralysis, one-sided head tilt and side rolling, and moribund state. One animal was found dead.

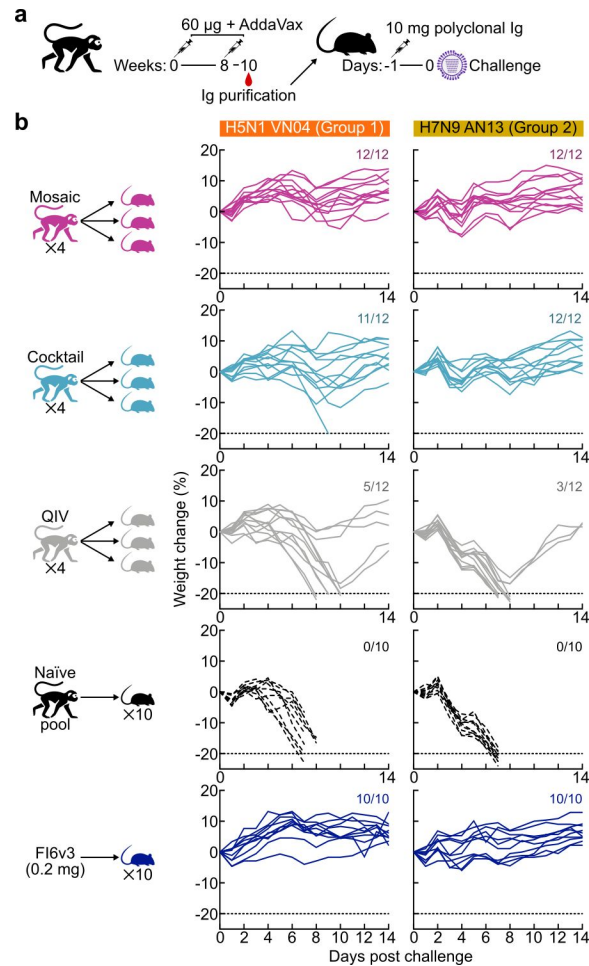

**Supplementary Fig. 5 | Body weight changes for mouse challenge studies after passive transfer of hyper immunoglobulins.** **a**, Experimental scheme of the study. Immunoglobulins were purified from immunized NHPs and given to recipient BALB/cAnNHsd mice ( $N = 3$  per NHP;  $N = 12$  per immunization group). Control groups of mice ( $N = 10$ ) were given either immunoglobulins obtained prior to immunization (Naïve pool) or anti-HA stem monoclonal antibody FI6v3. **b**, Changes in body weight after heterosubtypic H5N1 (left) or H7N9 (right) virus infection in recipient mice. Immunoglobulins were given intraperitoneally at day -1. Viruses were given intranasally on day 0 and mice were monitored for 14 days post infection. Body weight curves are plotted for each individual animal. Animals suffered  $>20\%$  of body weight loss from day 0 were humanely euthanized.

**Supplementary Table 1 | Amino acid sequences for novel proteins used in this study.**

**Non-antigen-bearing nanoparticle components**

>I53\_dn5A

MGKYDGSKLRIGILHARWNAEIIILALVLGALKRLQEFVVKRENIIEIVPGSFELPYGSKLFVEKQKRLGKPLDAIPIG  
VLIKGSTMHFEYICDSTTHQLMKNLFELGIPVIFVGLTCLTDEQAEARAGLIEGKMHNHGEDWGAAAVEMATKFNLE  
HHHHHH

>I53\_dn5B

MEEAELAYLLGELAYKLGEYRIAIRAYRIALKRDPNNAEAWYNLGNAYYKQGRYREAIEYYQKALELDPNNAEAWY  
NLGNAYYERGEYEEAIEYYRKALRLDPNNADAMQNLLNAKMREEGGWELQGSLEHHHHHH

**HA-I53\_dn5B trimers**

>H1-I53\_dn5B: A/Michigan/45/2015 HA 1-676 Y98F no lkr dn5B.SA.WELQ-H

MKAILVLLYFTTTANADTLICIGYHANNSTDTVDTVLEKNVTVTHSVNLLLEDKHNGKLCCKLRGVAPLHLGKCNIAGWI  
LGNPECESLSTASSWSYIVETSNSDNGTCFPGDFINYEELREQLSSVSSFERFEIFPKTSSWPNHDSNKGVTAAAC  
HAGAKSFYKNLIWLVKKGNISYPKLNQSYINDKGEVLLVWGIHHPSTTADQQSLYQNADAYVFGTSTRYSKFKFPE  
IATRPKVRDQEGRMNYYWTLVEPGDKITFEATGNLVVPRYAFTMERNAGSGIIISDTPVHDCNTTCQTPEGAINSTL  
PFQNIHPITIGKCPKYVKSTKLRLATGLRNVPISQSRGLFGAAGFIEGGWTGMVDGWYGYHHQNEQGSYGAAADLK  
STQNAIDKITNKVNSVIEKMTQFTAVGKEFNHLEKRIENLNKKVDDGFLDIWYNAELLVLENERLTDYHDSNVKN  
LYEKVRNQLKNNAKEIGNGCFEFYHKCDNTCMESVKNGTDYDPKYSEEAKLNREKIDGVSAAEEAELAYLLGELAYK  
LGEYRIAIRAYRIALKRDPNNAEAWYNLGNAYYKQGRYREAIEYYQKALELDPNNAEAWYNLGNAYYERGEYEEAI  
EYYRKALRLDPNNADAMQNLLNAKMREEGGWELQHHHHHHH

>H3-I53\_dn5B: A/Hong Kong/4801/2014 HA 1-676 Y98F GG lkr dn5B.SA.WELQ-H

MKTIIALSYILCLVFAQKIPGNDNSTATLCLGHHAVPNGTIVKTITNDRIEVTNATELVQNSSIGEICDSPHQILDGENC  
TLIDALLGDPQCDGFQNKKWDLFVERSKAYSNCFPYDVPDYASLRSLVASSGTLEFNNEFNWTGVTQNGTSSAC  
IRRSSSSFFSRLNWLTHLNYTYPALNVTMPNNEQFDKLYIWGVVHPGTDKQIFLYAQSSGRITVSTKRSQQAVIPN  
IGSRPRIRDIPSRSIYWTIVKPGDILLINSTGNLIAPRGYFKIRSGKSSIMRSDAPIGKCKSECITPNGSIPNDKPFQNV  
NRITYGACPRYVKHSTLKLATGMRNVPEKQTRGIFGAIAGFIENGWEGMVDGWYGFRRHQNSEGRGQAADLKSTQ  
AAIDQINGKLNRLIGKTNEKFHQIEKEFSEVEGRIQDLEKYVEDTKIDLWSYNAELLVALENQHTIDLTDSEMKNLFEK  
TKKQLRENAEDMGNGCFKIYHKCDNACIGSIRNGTYDHNVYRDEALNNRFQIKGVGGSAAEEAELAYLLGELAYKL  
EYRIAIRAYRIALKRDPNNAEAWYNLGNAYYKQGRYREAIEYYQKALELDPNNAEAWYNLGNAYYERGEYEEAIEY  
YRKALRLDPNNADAMQNLLNAKMREEGGWELQHHHHHHH

>B/Yam-I53\_dn5B: B/Phuket/3073/2013 HA 1-674 no lkr dn5B.SA.WELQ-H

MKAIIVLLMVVTSNADRICTGITSSNSPHVVKATQGEVNVTVIPLTTTPTKSYFANLKGTRTRGKLCPCDCLNCTDL  
DVALGRPMC VGTTPSAKASILHEVRPVTSGCFPIMHDRTKIRQLPNLLRGYEKIRLSTQNVIDAEKAPGGPYRLGTS  
GSCP NATSKIGFFATMAWAVPKDNYKNATNPLTVEVPYICTEGEDQITVWGFHSDNKTQMKSLYGDSNPQKFTSS  
ANGVTTHYVSQIGDFPDQTEDGGLPQSGRIVVDYMMQKPGKTGTIVYQRGVLLPQKVWCASGRSKVIKGSPLIG  
EADCLHEEYGGNLKSKPYTGHAKAIGNCPIWVKTPKLANGTKYRPPAKLLKERGFFGAIAGFLEGGWEGMIAG  
WHGYTSHGAHGVAAADLKSTQEAINKITKNLNSLSELEVKNLQRLSGAMDELHNEILELDEKVDDLADTISSQIEL  
AVLLSNEGIINSEDEHLLALERKLLKMLGPSAVDIGNGCFETKHKCNQTCLDRIAAGTFNAGEFSLPTFDSL NITAAS  
AEEAELAYLLGELAYKLGEYRIAIRAYRIALKRDPNNAEAWYNLGNAYYKQGRYREAIEYYQKALELDPNNAEAWY  
NLGNAYYERGEYEEAIEYYRKALRLDPNNADAMQNLLNAKMREEGGWELQHHHHHHH

>B/Vic-I53\_dn5B: B/Brisbane/60/2008 HA 1-674 no lkr dn5B.SA.WELQ-H

MKAIIVLLMVVTSNADRICTGITSSNSPHVVKATQGEVNVTVIPLTTTPTKSHFANLKGTE TRGKLCPCDCLNCTDL  
DVALGRPKCTGKIPSARVSILHEVRPVTSGCFPIMHDRTKIRQLPNLLRGYEHIRLSTHNVINAENAPGGPYKIGTSG  
SCP NITNGNGFFATMAWAVPKNDKNKTATNPLTIEVPYICTEGEDQITVWGFHSDNETQMAKLYGDSKPKFTSSA  
NGVTTHYVSQIGGFPNQTEDGGLPQSGRIVVDYMVQKSGKTGTITYQRGILLPQKVWCASGRSKVIKGSPLIGEA

DCLHEKYGGLNKSHPYYTGEHAKAIGNCPIWVKTPLKLANGTKYRPPAKLLKERGFFGAIAGFLEGGWEGMIAGW  
HGYTSHGAHGVAVAADLKSTQEAINKITKNLNSLSELEVKNLQRLSGAMDELHNEILELDEKVDLDRADTISSQIELA  
VLLSNEGIINSEDEHLLALERKLLKMLGPSAVEIGNGCFETKHKCNQTCLDRIAAGTFDAGEFSLPTFDSL NITAASA  
EEAELAYLLGELAYKLGEYRIAIRAYRIALKRDPNNAEAWYNLGNAYYKQGRYREAIEYYQKALELDPNNAEAWYNL  
GNAYYERGEYEEAIEYYRKALRLDPNNADAMQNLLNAKMREEGGWELQH HHHHHH

>SI16-I53\_dn5B: A/Singapore/INFIMH-16-0019/2016 HA 1-676 Y98F GG lkr dn5B.SA.WELQ-H  
MKTIIALSILCLVFAQKIPGNDNSTATLCLGHHAVPNGTIVKTITNDRIEVTNATELVQNSSIGEICDSPHQILDGENC  
TLIDALLGDPQCDGFQNKKWDLFVERSKAYSNCFPYDVPDYASLRSLVASSGTLEFKNESFNWTGVTQNGTSSAC  
IRGSSSSFFSRLNWLTHLNYTYPALNVTMPNKEQFDKLYIWGVHHPGTDKQIFLYAQSSGRITVSTKRSQQAVIPN  
IGSRPRIRDIPSRSIYWTIVKPGDILLINSTGNLIAPRGYFKIRSGKSSIMRSDAPIGKCKSECITPNGSIPNDKPFQNV  
NRITYGACPRYVKHSTLKLATGMRNVPEKQTRGIFGAIAGFIENGWEGMVDGWYGFRHQNSEGRGQAADLKSTQ  
AAIDQINGKLNRLIGKTNEKFHQIEKEFSEVEGRVQDLEKYVEDTKIDLWSYNAELLVALENQHTIDLTDSEMKNLFE  
KTKKQLRENAEDMGNGCFKIYHKCDNACIESIRNETYDHNVYRDEALNNRFQIKGVGGSAAEEAELAYLLGELAYKL  
GEYRIAIRAYRIALKRDPNNAEAWYNLGNAYYKQGRYREAIEYYQKALELDPNNAEAWYNLGNAYYERGEYEEAIE  
YYRKALRLDPNNADAMQNLLNAKMREEGGWELQH HHHHHH

>CO17-I53\_dn5B: B/Colorado/06/2017 HA 1-672 no lkr dn5B.SA.WELQ-H  
MKAIIVLLMVVTSSADRICTGITSSNSPHVVKATQGEVNVTVGIPLTTTPTKSHFANLKGTETRGKLCPCLNCTDL  
DVALGRPCKTGKIPSARVSILHEVRPVTSGCFPIMHRTKIRQLPNLLRGYEHVRLSTHNVINAEAGAPGGPYKIGTS  
GSCPNTNGNGFFATMAWAVPDKNKTATNPLTIEVPYVCTEGEDQITVWGFHSDNETQMAKLYGDSKPKFTSSA  
NGVTTHYVSQIGGFNPQTEDGGLPQSGRIVVDYMVQKSGKTGTITYQRGILLPQKVCASGRSKVIKGSPLIGEA  
DCLHEKYGGLNKSHPYYTGEHAKAIGNCPIWVKTPLKLANGTKYRPPAKLLKERGFFGAIAGFLEGGWEGMIAGW  
HGYTSHGAHGVAVAADLKSTQEAINKITKNLNSLSELEVKNLQRLSGAMDELHNEILELDEKVDLDRADTISSQIELA  
VLLSNEGIINSEDEHLLALERKLLKMLGPSAVEIGNGCFETKHKCNQTCLDKIAAGTFDAGEFSLPTFDSL NITAASA  
EEAELAYLLGELAYKLGEYRIAIRAYRIALKRDPNNAEAWYNLGNAYYKQGRYREAIEYYQKALELDPNNAEAWYNL  
GNAYYERGEYEEAIEYYRKALRLDPNNADAMQNLLNAKMREEGGWELQH HHHHHH

**HA-1na0C3\_int2 (non-assembling) trimers**

>H1-1na0C3\_int2: A/Michigan/45/2015 HA 1-676 Y98F no lkr 1na0C3\_int2.SA.WELQ-H  
MKAILVLLYFTTTANADTL CIGYHANNSTDTVDTVLEKNVTVTHSVNLLLEDKHNGKLCCKLRGVAPLHLGKCNIAGWI  
LGNPECESLSTASSWSYIVETSNSDNGTCFPGDFINYEELREQLSSVSSFERFEIFPKTSSWPNHDSNKGVTAACP  
HAGAKSFYKNLIWLKKGNSYPKLNQSYINDKGEVVLVWGIHHPSTTADQOSLYQNADAYVFGVTSRYSKFKFKE  
IATRPKVRDQEGRMNYWTLVEPGDKITFEATGNLVVPRYAFTMERNAGSGIIISDTPVHDCNTTCQTPGAINSTL  
PFQNIHPITIGKCPKYVKSTKLRLATGLRNVPISQSRGLFGAIAGFIEGGWTGMVDGWYGYYHHQNEQSGSYAADLK  
STQNAIDKITNKVNSVIEKMNTQFTAVGKEFNHLEKRIENLNKKVDDGFLDIWTYNAELLVLENERLTDYHDSNVKN  
LYEKVRNQLKNNAKEIGNGCFEFYHKCDNTCMESVKNGTDYDPKYSEEAKLNREKIDGVSAAEEAELAYLLGELAYK  
LGEYRIAIRAYRIALKRDPNNAEAWYNLGNAYYKQGDYDEAIEYYQKALELDPNNAEAWYNLGNAYYKQGDYDEA  
EYYQKALELDPNNAEAKQNLGNAKQKQGGWELQH HHHHHH

>H3-1na0C3\_int2: A/Hong Kong/4801/2014 HA 1-676 Y98F GG lkr 1na0C3\_int2.SA.WELQ-H  
MKTIIALSILCLVFAQKIPGNDNSTATLCLGHHAVPNGTIVKTITNDRIEVTNATELVQNSSIGEICDSPHQILDGENC  
TLIDALLGDPQCDGFQNKKWDLFVERSKAYSNCFPYDVPDYASLRSLVASSGTLEFNNEFNWTGVTQNGTSSAC  
IRRSSSSFFSRLNWLTHLNYTYPALNVTMPNNEQFDKLYIWGVHHPGTDKQIFLYAQSSGRITVSTKRSQQAVIPN  
IGSRPRIRDIPSRSIYWTIVKPGDILLINSTGNLIAPRGYFKIRSGKSSIMRSDAPIGKCKSECITPNGSIPNDKPFQNV  
NRITYGACPRYVKHSTLKLATGMRNVPEKQTRGIFGAIAGFIENGWEGMVDGWYGFRHQNSEGRGQAADLKSTQ  
AAIDQINGKLNRLIGKTNEKFHQIEKEFSEVEGRIQDLEKYVEDTKIDLWSYNAELLVALENQHTIDLTDSEMKNLFEK  
TKKQLRENAEDMGNGCFKIYHKCDNACIGSIRNGTYDHNVYRDEALNNRFQIKGVGGSAAEEAELAYLLGELAYKL  
EYRIAIRAYRIALKRDPNNAEAWYNLGNAYYKQGDYDEAIEYYQKALELDPNNAEAWYNLGNAYYKQGDYDEAIE  
YQKALELDPNNAEAKQNLGNAKQKQGGWELQH HHHHHH



>B/Yam-1na0C3\_int2: B/Phuket/3073/2013 HA 1-674 no lkr 1na0C3\_int2.SA.WELQ-H  
MKAIIVLLMVVTSNADRICTGITSSNSPHVVKATQGEVNVTVGVIPLTTTTPTKSYFANLKGTRTRGKLCPCDCLNCTDL  
DVALGRPMC VGTTPSAKASILHEVRPVTSGCFPIHMDRTKIRQLPNLLRGYEKIRLSTQNVIDAEKAPGGPYRLGTS  
GSCP NATSKIGFFATMAWAVPKDNYKNATNPLTVEVPYICTEGEDQITVWGFHSDNKTQMKSLYGDSNPQKFTSS  
ANGVTTHYVSQIGDFPDQTEDGGLPQSGRIVVDYMMQKPGKTGTIVYQRGVLLPQKVWCASGRSKVIKGSPLIG  
EADCLHEEYGGLNKSKPYTGGKHAKAIGNCPIWVKTPKLKLANGTKYRPPAKLLKERGFFGAIAGFLEGGWEGMIAG  
WHGYTSHGAHGVAVAADLKSTQEAINKITKNLNSLSELEVKNLQRLSGAMDELHNEILELDEKVDDL RADTISSQIEL  
AVLLSNEGIINSEDEHLLALERKLLKMLGPSAVDIGNGCFETKHKCNQTCLDRIAAGTFNAGEFSLPTFDSL NITAAS  
AAAELAYLLGELAYKLGEYRIAIRAYRIALKRDPNNAEAWYNLGNAYYKQGDYDEAIEYYQKALELDPNNAEAWY  
NLGNAYYKQGDYDEAIEYYQKALELDPNNAEAKQNLGNAKQKQGGWELQH HHHHHH

>B/Vic-1na0C3\_int2: B/Brisbane/60/2008 HA 1-674 no lkr 1na0C3\_int2.SA.WELQ-H  
MKAIIVLLMVVTSNADRICTGITSSNSPHVVKATQGEVNVTVGVIPLTTTTPTKSHFANLKGTRTRGKLCPCDCLNCTDL  
DVALGRPKCTGKIPSARVSILHEVRPVTSGCFPIHMDRTKIRQLPNLLRGYEHIRLSTHNVINAENAPGGPYKIGTSG  
SCPNITNGNGFFATMAWAVPKNDKNKTATNPLTIEVPYICTEGEDQITVWGFHSDNETQMAKLYGDSKPKFTSSA  
NGVTTHYVSQIGGFPNQTEDGGLPQSGRIVVDYMVQKSGKTGTITYQRGILLPQKVWCASGRSKVIKGSPLIGEA  
DCLHEKYGGLNKSKPYTGEHAKAIGNCPIWVKTPKLKLANGTKYRPPAKLLKERGFFGAIAGFLEGGWEGMIAGW  
HGYTSHGAHGVAVAADLKSTQEAINKITKNLNSLSELEVKNLQRLSGAMDELHNEILELDEKVDDL RADTISSQIELA  
VLLSNEGIINSEDEHLLALERKLLKMLGPSAVEIGNGCFETKHKCNQTCLDRIAAGTFDAGEFSLPTFDSL NITAASA  
EEAELAYLLGELAYKLGEYRIAIRAYRIALKRDPNNAEAWYNLGNAYYKQGDYDEAIEYYQKALELDPNNAEAWYNL  
GNAYYKQGDYDEAIEYYQKALELDPNNAEAKQNLGNAKQKQGGWELQH HHHHHH

**HA-foldon trimers (ELISA antigens and EMPEM)**

>H1 MI15: A/Michigan/45/2015 HA 1-676 Y98F FAH  
MKAILVLLYFTTTANADTL CIGYHANNSTDTVDTVLEKNVTVTHSVNLLLEDKHNGKLCCKLRGVAPLHLGKCNIAWGI  
LGNPECESLSTASSWSYIVETSNSDNGTCFPGDFINYEELREQLSSVSSFERFEIFPKTSSWPNHDSNKGVTAACP  
HAGAKSFYKNLIWLVKKNSYPKLNQSYINDKGEVLLVWGIHHPSTTADQQSLYQNADAYVFGVTSRYSKFKPE  
IATRPKVRDQEGRMNYYWTLVEPGDKITFEATGNLVVPRYAFTMERNAGSGIIISDTPVHDCNTTCQTPGAINSTL  
PFQNIHPITIGKCPKYVKSTKLRLATGLRNVPSIQSRGLFGAIAGFIEGGWTGMVDGWYGYHHQNEQSGSYAADLK  
STQNAIDKITNKVNSVIEKMNTQFTAVGKEFNHLEKRIENLNKKVDDGFLDIWTYNAELLVLENERLTDYHDSNVKN  
LYEKVRNQLKNNAKEIGNGCFEFYHKCDNTCMESVKNGTDYDPKYSEEAKLNREKIDGVGSGYIPEAPRDGQAYV  
RKDGEWVLLSTFLGSGLNDIFEAQKIEWHEGHHHHH

>H3 HK14: A/Hong Kong/4801/2014 HA 1-676 Y98F FAH  
MKTIIALS YILCLVFAQKIPGNDNSTATLCLGHHAVPNGTIVKTIITNDRIEVTNATELVQNSSIGEICDSPHQILDGENC  
TLIDALLGDPQCDGFQNKWDLFVERSKAYSNCFPYDVPDYASLRSLVASSGTLEFNNEFNWTVGTQNGTSSAC  
IRRSSSSFFSRLNWLTHLNYTYPALNVTMPNNEQFDKLYIWGVHHPGTDKQIFLYAQSSGRITVSTKRSQAVIPN  
IGSRPRIRDIPSRSIYWTVKPGDILLINSTGNLIAPRGYFKIRSGKSSIMRSDAPIGKCKSECITPNGSIPNDKPFQNV  
NRITYGACPRYVKHSTLKLATGMRNVPEKQTRGIFGAIAGFIENGWEGMVDGWYGFHRHQNSEGRGQAADLKSTQ  
AAIDQINGKLNRLIGKTNEKFHQIEKEFSEVEGRIQDLEKYVEDTKIDLWSYNAELLVALENQHTIDLT DSEMKNLFEK  
TKKQLRENAEDMGNGCFKIYHKCDNACIGSIRNGTYDHNVYRDEALNNRFQIKGVGSGYIPEAPRDGQAYVRKDG  
EWVLLSTFLGSGLNDIFEAQKIEWHEGHHHHH

>B/Yam PH13: B/Phuket/3073/2013 HA 1-676 FAH  
MKAIIVLLMVVTSNADRICTGITSSNSPHVVKATQGEVNVTVGVIPLTTTTPTKSYFANLKGTRTRGKLCPCDCLNCTDL  
DVALGRPMC VGTTPSAKASILHEVRPVTSGCFPIHMDRTKIRQLPNLLRGYEKIRLSTQNVIDAEKAPGGPYRLGTS  
GSCP NATSKIGFFATMAWAVPKDNYKNATNPLTVEVPYICTEGEDQITVWGFHSDNKTQMKSLYGDSNPQKFTSS  
ANGVTTHYVSQIGDFPDQTEDGGLPQSGRIVVDYMMQKPGKTGTIVYQRGVLLPQKVWCASGRSKVIKGSPLIG  
EADCLHEEYGGLNKSKPYTGGKHAKAIGNCPIWVKTPKLKLANGTKYRPPAKLLKERGFFGAIAGFLEGGWEGMIAG  
WHGYTSHGAHGVAVAADLKSTQEAINKITKNLNSLSELEVKNLQRLSGAMDELHNEILELDEKVDDL RADTISSQIEL  
AVLLSNEGIINSEDEHLLALERKLLKMLGPSAVDIGNGCFETKHKCNQTCLDRIAAGTFNAGEFSLPTFDSL NITAAS  
LGSYIPEAPRDGQAYVRKDG EWVLLSTFLGSGLNDIFEAQKIEWHEGHHHHH

>B/Vic BR08: B/Brisbane/60/2008 HA 1-676 FAH

MKAIIVLLMVVTSNADRICTGITSSNSPHVVKATQGEVNVTVGVIPLTTTPTKSHFANLKGTETRGKLCPKCLNCTDL  
DVALGRPCKTGKIPSARVSILHEVRPVTSGCFPIIMHDRTKIRQLPNLLRGYEHIRLSTHNVINAENAPGGPYKIGTSG  
SCPNITNGNGFFATMAWAVPKNDKNTATNPLTIEVPYICTEGEDQITVWGFHSDNETQMAKLYGDSKPKQFTSSA  
NGVTTHYVVSQIGGFNPQTEDGGLPQSGRIVVDYMVQKSGKTGTITYQRGILLPQKVWCASGRSKVIKGSPLIGEA  
DCLHEKYGGLNKSYPYTTGEHAKAIGNCPIVVKTPKLANGTKYRPPAKLLKERGFFGAIAGFLEGGWEGMIAGW  
HGYTSHGAHGVAADLKSTQEAINKITKNLNSLSELEVKNLQRLSGAMDELHNEILELDEKVDDLDRADTISSQIELA  
VLLSNEGIINSEDEHLLALERKLLKMLGPSAVEIGNGCFETKHKCNQTCLDRIAAGTFDAGEFSLPTFDSL NITAASL  
GSYIPEAPRDGQAYVRKDGEWVLLSTFLGSGLNDIFEAQKIEWHEGHHHHHH

>H5 IN05: A/Indonesia/05/2005 HA 1-676 Y98F deIF FAH

MEKIVLLLAIVSLVKSDQICIGYHANNSTEQVDTIMEKNVTVTHAQDILEKTHNGKLCDLGDKVPLILRDCSVAGWLL  
GNPMCDEFINVPESYIVEKANPTNDLCFPGSFNDYEELKHLISRINHFEKIQIIPKSSWSDHEASSGVSSACPYLG  
SPSFFRNWVWLKKNSTYPTIKKSYNNTNQEDLLVLWGIHHPNDAAEQTRLYQNPTTYISIGTSTLNQRLVPKIATRS  
KVNGQSGRMEFFWTILKPNDAINFESNGNFIAPYAYKIVKKGDSAIMKSELEYGNCNTKCQTPMGAINSSMPFHNI  
HPLTIGECPKYVKS NRLVLATGLRNSPQRESRGLFGAIAGFIEGGWQGMVDGWYGYHHSNEQSGSYAADKESTQ  
KAIDGVTNKVNSIIDKMNTQFEAVGREFNLERRIENLNKMMEDGFLDVWTYNAELLVLMENERTLDFHDSNVKNL  
YDKVRLQLRDNAKELGNGCFEFYHKCDNECMESIRNGTYNYPQYSEEARLKREEISGVGSYIPEAPRDGQAYVR  
KDGEWVLLSTFLGSGLNDIFEAQKIEWHEGHHHHHH

>H6 TW13: A/Taiwan/2/2013 HA 1-676 Y98F FAH

MIAIVVIAILASAGKSDKICIGYHANNSTTQVDTLLEKNVTVTHSVELLENQKEKRFCKIMNKAPLDLKDCTIEGWILGN  
PKCDLLLDGQSWSYIVERPNAQNGICFPGLNELEELKAFIGSGSERVERFEMFPKSTWAGVDTSRGTNACPSYTI  
DSSFYRNLVWIKTDSATYVVIKGTYNNTGTQPILYFWGVHHPDITTVQDNLYGSGDKYVRMGTESMNFASPEIA  
ARPAVNGQRSRIDYWSVLRPGETLNVESNGNLIAPWYAYKFVSTNKKGAVFKSDLPIENC DATCQTITGLVRTNK  
TFQNVSPWLWIGECPKYVKS ESSLRLATGLRNVQIATRIGIFGAIAGFIEGGWTGMIDGWYGYHHENSQSGSYAADR  
ESTQKAIDGITNKVNSIINKMNTQFEAVDHEFSNLERRIGNLNKRMEGFLDVWTYNAELLVLENERLTLHDANV  
KNLYEKVKSQRDNANDLNGGCFEFWHKCDNECMESVKNGTYPKYQKESKLNRRQIESVGSYIPEAPRDGQ  
AYVRKDGEWVLLSTFLGSGLNDIFEAQKIEWHEGHHHHHH

>H7 AN13: A/Anhui/1/2013 HA 1-676 Y98F FAH

MNTQILVFALIAIPTNADKICLGHHAVSNGTKVNTLTERGVEVNVATETVERTNIPRICSKGKRTVDLQCGLLGTIT  
GPPQCDQFLEFSADLIERREGSDVCFPGKRVNEEALRQILRESGGIDKEAMGFTYSGIRTNAGTSACRRSGSSFY  
AEMKWLLSNTDNAAFPQMTKSYKNTRKSPALIVWGIHHSVSTAEQTKLYGSGNKLVTVGSSNYQQSFVPSGARP  
QVNGLSGRIDFHWM LNPNNDTVTFSFNGAFIAPDRASFLRGKSMGIQSGVQVDANCEGDCYHSGGTIISNLPFQNI  
DSRAVGKCPRYVKQRSLLLATGMKNVPEIPKGRGLFGAIAGFIENGWEGLIDGWYGFRHQNAQGEETAADYKSTQ  
SAIDQITGKLNRLIEKTNQFELIDNEFNEVEKQIGNVINWTRDSITEVWSYNAELLVAMENQHTIDLADSEMCKLYE  
RVKRQLRENAEEDGTGCFEIFHKCDDDCMASIRNNTYDHSKYREEAMQNRIQIDPVGSYIPEAPRDGQAYVRKD  
GEWVLLSTFLGSGLNDIFEAQKIEWHEGHHHHHH

>H10 JD13: A/Jiangxi Donghu/346/2013 HA 1-676 Y98F FAH

MYKIVVIIALLGAVKGLDKICLGHHAVANGTIVKTLTNEQEEVTNATETVESTGINRLCMKGRKHKDLGNCHPIGMLIG  
TPACDLHLTGMWDTLIERENAIAYCFPGATVNVEALRQKIMESGGINKISTGFTYSSINSAGTTRACMRNGGNSFY  
AELKWLVSKSKGQNFQTTNTYRNTDTAEHLIMWGIHHSSTQEKNLDYGTQSLSSISVGSSTYRNNFVVPVVGARP  
QVNGQSGRIDFHWTLVQPGDNITFSHNGGLIAPSRVSKLIGRGLGIQSDAPIDNNCESKCFWRGGSINTRLPFQNL  
SPRTVGQCPKYVNRSLMLATGMRNVPELIQGRGLFGAIAGFLENGWEGMVDGWYGFRHQNAQGTGQAADYKS  
TQAAIDQITGKLNRLVEKTNTEFESIESEFSEIEHQIGNVINWTKDSITDIWYQAEALLVAMENQHTIDMADSEMLNLY  
ERVRKQLRQNAEEDGKGCFEIYHACDDSCMESIRNNTYDHSQYREEALLNRLNINPVGSYIPEAPRDGQAYVRK  
DGEWVLLSTFLGSGLNDIFEAQKIEWHEGHHHHHH

>H1 stem: A/California/04/2009 stabilized stem FAH

MKAILVLLYTFATANADTLCIGYHANNSTDTVDTVLEKNVTVTHSVNLGSGLRLATGLRNIPQRETRGLFGAIAGFI  
EGGWTGMVDGWYGYHHQNEQSGSYAADLKSTQNAIDEITNMVNSVIEKMGSGGSGTDLAELLVLLLNQWTLLYH

DSNVKNLYEKVRSQKNNAKEIGNGCFEFYHKCDNTCMESVKNGTYDYPKYSEEAKLNREEIDGSGYIPEAPRDG  
QAYVRKDGEWVLLSTFLGSLNDIFEAQKIEWHEGHHHHH

>H3 stem: A/Finland/486/2004 stabilized stem FAH

MKTIIALSYILCLVFAQKLPGNDNSTATLCLGHHAVPNGTIVKTITNDQIEVTNATELVFPGCGVLKLATGMRNVPEK  
QTRGIFGAIAGFIENGWEGMVDGWYGFRHQNSEGIGQAADLKSTQAAINQINGMVNRVIALMAQGGPDCYLAELL  
VALLNQHVIDLTDSEMRKLFERTKKQLRENAEDMGNGCFKIYHKCDNACIGSIRNGTYDHDVYRDEALNNRFQIKG  
GPGSGYIPEAPRDGQAYVRKDGEWVLLSTFLGSLNDIFEAQKIEWHEGHHHHH

>H3 SG16: A/Singapore/INFIMH-16-0019/2016 HA 1-676 Y98F FAH

MKTIIALSYILCLVFAQKIPGNDNSTATLCLGHHAVPNGTIVKTITNDRIEVTNATELVQNSSIGEICDSPHQILDGENC  
TLIDALLGDPQCDGFQNKKWDLFVERSKAYSNCFPYDVPDYASLRSLVASSGTLEFKNESFNWTGVTQNGTSSAC  
IRGSSSSFFSRLNWLTHLNYTYPALNVTMPNKEQFDKLYIWGVHHPGTDKDKQIFLYAQSSGRITVSTKRSQQAVIPN  
IGSRPRIRDIPSRSIYWTIVKPGDILLINSTGNLIAPRGYFKIRSGKSSIMRSDAPIGKCKSECITPNGSIPNDKPFQNV  
NRITYGACPRYVKHSTLKLATGMRNVPEKQTRGIFGAIAGFIENGWEGMVDGWYGFRHQNSEGRGQAADLKSTQ  
AAIDQINGKLNRLIGKTNEKFHQIEKEFSEVEGRVQDLEKYVEDTKIDLWSYNAELLVALENQHTIDLTDSEMKNLFE  
KTKKQLRENAEDMGNGCFKIYHKCDNACIESIRNETYDHNVYRDEALNNRFQIKGVGSGYIPEAPRDGQAYVRKD  
GEWVLLSTFLGSLNDIFEAQKIEWHEGHHHHH

>B/Vic CO17: B/Colorado/06/2017 HA 1-676 FAH

MKAIIVLLMVVTSSADRICTGITSSNSPHVVKATQGEVNVTVGIPLTTTPTKSHFANLKGTETRGKLCPKCLNCTDL  
DVALGRPCKTGKIPSARVSILHEVRPVTSGCFPIMHDRTKIRQLPNLLRGYEHVRLSTHNVINAEGAPGGPYKIGTS  
GSCPNTNGNGFFATMAWAVDPKNKTATNPLTIEVPYVCTEGEDQITVWGFHSDNETQMAKLYGDSKPQKFTSSA  
NGVTTHYVSQIGGFNPQTEDGGLPQSGRIVVDYMVQKSGKTGTITYQRGILLPQKVWCASGRSKVIKGSPLIGEA  
DCLHEKYGGLNKSHPYYTGEHAKAIGNCPIWVKTPKLANGTKYRPPAKLLKERGFFGAIAGFLEGGWEGMIAGW  
HGYTSHGAHGVAVAADLKSTQEAINKITKNLSLSELEVKNLQRLSGAMDELHNEILELDEKVDDLADTSSQIELA  
VLLSNEGIINSEDEHLLALERKLLKMLGPSAVEIGNGCFETKHKCNQTCLDKIAAGTFDAGEFSLPTFDSL NITAASL  
GSGYIPEAPRDGQAYVRKDGEWVLLSTFLGSLNDIFEAQKIEWHEGHHHHH

Appended sequences including the foldon trimerization domain, WELQut protease recognition sites, Avi tags, and hexa-histidine tags are underlined.

**Supplementary Table 2 | Cryo-EM data collection, refinement and validation statistics.**

|                                                     | H1-I53_dn5<br>nanoparticle<br>(EMD-22935) | H1 HA/M115<br>Localized<br>reconstruction<br>(EMD-22937;<br>PDB 7KNA) | H5 bound to<br>3 polyclonal<br>Fabs<br>(EMD-22940) | H5 bound to<br>2 polyclonal<br>Fabs<br>(EMD-22939) | H5 bound to<br>1 polyclonal<br>Fab<br>(EMD-22938) |
|-----------------------------------------------------|-------------------------------------------|-----------------------------------------------------------------------|----------------------------------------------------|----------------------------------------------------|---------------------------------------------------|
| <b>Data collection and processing</b>               |                                           |                                                                       |                                                    |                                                    |                                                   |
| Magnification                                       | 130,000                                   | 130,000                                                               | 130,000                                            | 130,000                                            | 130,000                                           |
| Voltage (kV)                                        | 300                                       | 300                                                                   | 300                                                | 300                                                | 300                                               |
| Electron exposure (e <sup>-</sup> /Å <sup>2</sup> ) | 70                                        | 70                                                                    | 70                                                 | 70                                                 | 70                                                |
| Defocus range (µm)                                  | 0.5-3.0                                   | 0.5-3.0                                                               | 0.5-3.0                                            | 0.5-3.0                                            | 0.5-3.0                                           |
| Pixel size (Å)                                      | 0.525                                     | 0.525                                                                 | 0.525                                              | 0.525                                              | 0.525                                             |
| Symmetry imposed                                    | I                                         | C3                                                                    | C1                                                 | C1                                                 | C1                                                |
| Initial particle images (no.)                       | 22,563                                    | 397,700<br>(sym-exp)                                                  | 115,722                                            | 115,722                                            | 115,722                                           |
| Final particle images (no.)                         | 19,885                                    | 148,916                                                               | 36,783                                             | 19,849                                             | 22,211                                            |
| Map resolution (Å)                                  | 6.6                                       | 3.3                                                                   | 3.6                                                | 4.1                                                | 4.0                                               |
| FSC threshold                                       | 0.143                                     | 0.143                                                                 | 0.143                                              | 0.143                                              | 0.143                                             |
| <b>Refinement</b>                                   |                                           |                                                                       |                                                    |                                                    |                                                   |
| Model resolution (Å)                                |                                           | 3.4                                                                   |                                                    |                                                    |                                                   |
| FSC threshold                                       |                                           | 0.5                                                                   |                                                    |                                                    |                                                   |
| Map sharpening <i>B</i> factor (Å <sup>2</sup> )    |                                           | -174                                                                  |                                                    |                                                    |                                                   |
| <b>Model composition</b>                            |                                           |                                                                       |                                                    |                                                    |                                                   |
| Nonhydrogen atoms                                   |                                           | 11,593                                                                |                                                    |                                                    |                                                   |
| Protein residues                                    |                                           | 1,449                                                                 |                                                    |                                                    |                                                   |
| Ligands                                             |                                           | 24 (NAG)                                                              |                                                    |                                                    |                                                   |
| <b><i>B</i> factors (Å<sup>2</sup>)</b>             |                                           |                                                                       |                                                    |                                                    |                                                   |
| Protein                                             |                                           | 37.5                                                                  |                                                    |                                                    |                                                   |
| Ligand                                              |                                           | 44.2                                                                  |                                                    |                                                    |                                                   |
| <b>R.m.s. deviations</b>                            |                                           |                                                                       |                                                    |                                                    |                                                   |
| Bond lengths (Å)                                    |                                           | 0.015                                                                 |                                                    |                                                    |                                                   |
| Bond angles (°)                                     |                                           | 1.4                                                                   |                                                    |                                                    |                                                   |
| <b>Validation</b>                                   |                                           |                                                                       |                                                    |                                                    |                                                   |
| MolProbity score                                    |                                           | 0.66                                                                  |                                                    |                                                    |                                                   |
| Clashscore                                          |                                           | 0.4                                                                   |                                                    |                                                    |                                                   |
| Poor rotamers (%)                                   |                                           | 0.5                                                                   |                                                    |                                                    |                                                   |
| <b>Ramachandran plot</b>                            |                                           |                                                                       |                                                    |                                                    |                                                   |
| Favored (%)                                         |                                           | 97.91                                                                 |                                                    |                                                    |                                                   |
| Allowed (%)                                         |                                           | 1.88                                                                  |                                                    |                                                    |                                                   |
| Disallowed (%)                                      |                                           | 0.21                                                                  |                                                    |                                                    |                                                   |

**Supplementary Table 3 | Peptides used in label-free quantitation of HA content in mosaic nanoparticles and data for post-SEC quantitation of HA content in qsMosaic-I53\_dn5 (related to [Extended Data Fig. 3](#)).**

| HA con-struct | Unique peptide sequence <sup>a</sup> | Standard equimolar mix (area) | qsMosaic-I53_dn5 post-SEC (area) | Relative ratio (qsMosaic-I53_dn5 /standard) | Average relative ratio and standard deviation | qsMosaic-I53_dn5 post-SEC composition <sup>b</sup> |
|---------------|--------------------------------------|-------------------------------|----------------------------------|---------------------------------------------|-----------------------------------------------|----------------------------------------------------|
| H1            | NLIWLVK                              | 1.07×10 <sup>7</sup>          | 5.35×10 <sup>6</sup>             | 0.502                                       | 0.558 +/- 0.028                               | 21.2 +/- 2.8 %                                     |
|               | GVTAACPHAGAK                         | 1.44×10 <sup>6</sup>          | 9.59×10 <sup>5</sup>             | 0.668                                       |                                               |                                                    |
|               | KFKPEIATRPK                          | 1.18×10 <sup>6</sup>          | 6.22×10 <sup>5</sup>             | 0.529                                       |                                               |                                                    |
|               | FKPEIATRPK                           | 2.46×10 <sup>6</sup>          | 1.32×10 <sup>6</sup>             | 0.536                                       |                                               |                                                    |
| H3            | KWDLFVERSK +WDLFVERSK <sup>c</sup>   | 5.88×10 <sup>6</sup>          | 4.87×10 <sup>6</sup>             | 0.827                                       | 0.720 +/- 0.030                               | 27.3 +/- 3.0 %                                     |
|               | SSIMRSDAIGK <sup>d</sup>             | 1.05×10 <sup>7</sup>          | 7.45×10 <sup>6</sup>             | 0.707                                       |                                               |                                                    |
|               | LATGMRNVPEK <sup>d</sup>             | 6.24×10 <sup>6</sup>          | 3.99×10 <sup>6</sup>             | 0.638                                       |                                               |                                                    |
|               | EFSEVEGRIQDLEK <sup>e</sup>          | 8.62×10 <sup>6</sup>          | 6.11×10 <sup>6</sup>             | 0.709                                       |                                               |                                                    |
| B/Yam         | IRLSTQNVIDAEK                        | 5.44×10 <sup>6</sup>          | 3.77×10 <sup>6</sup>             | 0.693                                       | 0.632 +/- 0.012                               | 24.0 +/- 1.6 %                                     |
|               | SLYGDSNPQK                           | 5.01×10 <sup>6</sup>          | 3.11×10 <sup>6</sup>             | 0.621                                       |                                               |                                                    |
|               | SYFANLK                              | 6.73×10 <sup>6</sup>          | 4.00×10 <sup>6</sup>             | 0.595                                       |                                               |                                                    |
|               | IRQLPNLLRGYEK                        | 1.30×10 <sup>7</sup>          | 8.07×10 <sup>6</sup>             | 0.620                                       |                                               |                                                    |
| B/Vic         | GSLPLIGEADCLHEK                      | 7.38×10 <sup>6</sup>          | 5.19×10 <sup>6</sup>             | 0.703                                       | 0.727 +/- 0.013                               | 27.6 +/- 1.3 %                                     |
|               | LYGDSKPQK                            | 4.92×10 <sup>5</sup>          | 3.60×10 <sup>5</sup>             | 0.731                                       |                                               |                                                    |
|               | TGTITYQRGILLPQK                      | 6.72×10 <sup>6</sup>          | 4.70×10 <sup>6</sup>             | 0.700                                       |                                               |                                                    |
|               | VWCASGRSK                            | 1.99×10 <sup>6</sup>          | 1.54×10 <sup>6</sup>             | 0.773                                       |                                               |                                                    |

<sup>a</sup>Only abundant peptides that were unique to each specific HA were included.

<sup>b</sup>Normalized to the total sum of the average relative ratios.

<sup>c</sup>A high degree of missed cleavage was observed for this peptide and the sum of the two peptides was used for the calculations.

<sup>d</sup>The oxidized methionine forms were also included in these calculations.

<sup>e</sup>The pyro-glutamic acid form of the peptide was also included in these calculations.

**Supplementary Table 4 | Viruses used in HAI, microneutralization, and challenge experiments.**

| Subtype             | Virus                           | Short name         | Type of experiment         | Figure                                 |                  |
|---------------------|---------------------------------|--------------------|----------------------------|----------------------------------------|------------------|
| H1N1                | A/Michigan/45/2015              | MI15; 2015         | HAI                        | 2a; ED 4e; ED 5c                       |                  |
|                     |                                 |                    | Microneutralization        | 2b; 3a; ED 4e; ED 5d; 5b; ED 7f; ED 10 |                  |
|                     | A/Boston/YGA-01050/2012         | 2012               | Microneutralization        | 3a; ED 6                               |                  |
|                     | A/California/07/2009            | 2009               | Microneutralization        | 3a; ED 6                               |                  |
|                     | A/Weiss/1943                    | 1943               | Microneutralization        | 3a; ED 6                               |                  |
|                     | A/Malaysia/1954                 | 1954               | Microneutralization        | 3a; ED 6                               |                  |
|                     | A/USSR/90/1977                  | 1977               | Microneutralization        | 3a; ED 6                               |                  |
|                     | A/Memphis/4/1987                | 1987               | Microneutralization        | 3a; ED 6                               |                  |
|                     | A/New York/146/2000             | 2000               | Microneutralization        | 3a; ED 6                               |                  |
|                     | A/New Caledonia/20/1999         | 1999               | Microneutralization        | 3a; ED 6                               |                  |
| H3N2                | A/Solomon Islands/03/2006       | 2006               | Microneutralization        | 3a; ED 6                               |                  |
|                     | A/Puerto Rico/8/1934            | PR8                | Challenge (mice)           | 3b; S3b                                |                  |
|                     |                                 |                    | Pseudovirus neutralization | 3b                                     |                  |
|                     | A/Hong Kong/4801/2014           | HK14; 2014         | HAI                        | 2a                                     |                  |
|                     |                                 |                    | Microneutralization        | 2b; 3a; ED 4e; ED 7f                   |                  |
|                     | A/Switzerland/9715293/2013      | 2013               | Microneutralization        | 3a; ED 6                               |                  |
|                     | A/Texas/50/2012                 | 2012               | Microneutralization        | 3a; ED 6                               |                  |
|                     | A/Victoria/361/2011             | 2011               | Microneutralization        | 3a; ED 6                               |                  |
|                     | A/Brisbane/10/2007              | 2007               | Microneutralization        | 3a; ED 6                               |                  |
|                     | A/Wisconsin/67/2005             | 2005               | Microneutralization        | 3a; ED 6                               |                  |
| H5N1                | A/Fujian/411/2002               | 2002               | Microneutralization        | 3a; ED 6                               |                  |
|                     | A/Moscow/10/1999                | 1999               | Microneutralization        | 3a; ED 6                               |                  |
|                     | A/Shangdong/9/1993              | 1993               | Microneutralization        | 3a; ED 6                               |                  |
|                     | A/Philippines/2/1982            | PH82               | Challenge (mice)           | 3c; S3c                                |                  |
|                     |                                 |                    | Pseudovirus neutralization | 3c                                     |                  |
|                     | A/Singapore/INFIMH-16-0019/2016 | SG16               | Microneutralization        | ED 5d; ED 10                           |                  |
|                     | A/Vietnam/1203/2004             | VN04               | Challenge (mice, ferrets)  | 4d–f; S3d; S4b; S5b                    |                  |
|                     |                                 |                    | Microneutralization        | 5b                                     |                  |
|                     | H7N9                            | A/Anhui/1/2013     | AN13                       | Challenge (mice, ferrets)              | 4d–f; S3e; S4c   |
|                     | B/Yam                           | B/Phuket/3073/2013 | PH13                       | HAI                                    | 2a; ED 4e; ED 5c |
| Microneutralization |                                 |                    |                            | 2b; ED 4e; ED 5d; ED 7f; ED 10         |                  |
| B/Vic               | B/Colorado/06/2017              | CO17               | HAI                        | 2a; ED 4e; ED 5c                       |                  |
|                     |                                 |                    | Microneutralization        | 2b; ED 5d; ED 7f; ED 10                |                  |
